# Supplementary material for: Tongue-driven sonar beam steering by a lingual-echolocating fruit bat
Source: PLoS Biol. 2017 Dec 15;15(12):e2003148. doi: 10.1371/journal.pbio.2003148 (PMC5774845; doi:10.1371/journal.pbio.2003148)
Supplement: S1 Table — These criteria were designed so that the azimuth-elevation domain covered by the microphone array is sufficiently large, and that the high intensity region of the beam pattern immediately adjacent to the maximum intensity microphone was properly sampled. Here, the maximum intensity microphone refers to the channel that receives the highest sound intensity. (XLSX) [file pbio.2003148.s010.xlsx]

## Sheet: Sheet1
	Criteria	Rationale
1	More than 10 microphones are within ±60˚ in azimuth and elevation from the maximum intensity microphone.	The azimuth-elevation space near the maximum intensity microphone is adequately sampled.
2	The maximum intensity microphone falls within ±60˚ in azimuth and elevation from the head aim of the bat.	Clicks that point too far to the side of the bat are excluded in the analysis.
3	The maximum intensity microphone is not at the edge of the outer boundary in azimuth and elevation spanned by all the microphones.	The azimuth and elevation dimensions of the beam pattern are sampled on both sides of the maximum intensity microphone.
4	At least 3 microphones fall within the -3 dB contour of the interpolated beam pattern in the azimuth-elevation domain.	The high intensity area of the beam pattern is densely sampled; this criterion was set with respect to the -3 dB contour because this contour was used to quantify the beam pattern shape.
5	The area enclosed by the outer boundary in the azimuth-elevation plane spanned by all the microphones occupies more than 40% of the total area between the ±90˚ azimuth-elevation domain. The azimuth and elevation location of each microphone was obtained by projecting the microphone location to a bat-centered coordinate, as detailed in Materials and Methods.	The azimuth and elevation space around the bat is adequately sampled.
