# Supplementary material for: Tongue-driven sonar beam steering by a lingual-echolocating fruit bat
Source: PLoS Biol. 2017 Dec 15;15(12):e2003148. doi: 10.1371/journal.pbio.2003148 (PMC5774845; doi:10.1371/journal.pbio.2003148)
Supplement: S2 Table — This mesh was subsequently scaled to fit the length, width, and height of the bat head mesh derived from μCT scans. μCT, micro computed tomography. (XLSX) [file pbio.2003148.s011.xlsx]

## Sheet: Sheet1
Node number	Node locations in Cartesian coordinate (cm)
1	0	0	1.5
2	0	0	-1.5
3	0	0	-3
4	0	0	0
5	0	-1.5	-1.5
6	0	1.5	-1.5
7	-1.5	0	-1.5
8	1.5	0	-1.5
9	0	0.5	1.5
10	0	-0.5	1.5
11	0.5	0	1.5
12	-0.5	0	1.5
13	0	0	1.3
14	0	0	1.7
15	0.4	0	1.7
16	-0.4	0	1.7
17	0	0.4	1.7
18	0	-0.4	1.7
19	0	0	1.9
20	0.3	0	1.9
21	-0.3	0	1.9
22	0	0.3	1.9
23	0	-0.3	1.9
